# Supplementary material for: The acoustic presence and migration timing of subarctic baleen whales in the Bering Strait in relation to environmental factors
Source: Research Square preprint supplement (doi:10.21203/rs.3.rs-4397210/v1), 2024-06-05
Supplement: Supplementary file 1 [file 1f2dd7f02a892ab4578232c2.docx]

**The acoustic presence and migration timing of subarctic baleen whales in the Bering Strait in relation to environmental factors**

Erica D. Escajedaa,*, Kathleen M. Staffordb, Rebecca A. Woodgatec, and Kristin L. Laidred

a School of Aquatic and Fishery Sciences, University of Washington, Seattle, Washington, USA; email: ericaescajeda@gmail.com

b Marine Mammal Institute, Oregon State University, Newport, Oregon, USA; email: kate.stafford@oregonstate.edu

c Applied Physics Laboratory, University of Washington, Seattle, Washington, USA; email: woodgate@uw.edu

d Applied Physics Laboratory, University of Washington, Seattle, Washington, USA; email: klaidre@uw.edu

* Contact information for corresponding author: ericaescajeda@gmail.com ORCID: 0000-0003-4194-8992

# Supplementary Tables and Figures

**Table S1.** Results of the Pearson correlation tests between seasonal means for near-bottom temperature and salinities (‘SBE Temp’ and ‘SBE Salt’), sea-surface temperatures (SST), water speeds, and wind speeds. The pink shading denotes correlations with an absolute value > 0.7 and *p* < 0.05.

**Table S2.** Results of the linear regression for the departure dates (*y*) for each species vs. seasonal means of environmental variables (*x*). Only the variables with a significant, linear relationship to the departure dates (*p* < 0.05) are listed below, including seasonal means for sea-surface temperatures (SST, °C), near bottom temperatures (measured with SBE-16 instrument, °C), and mid-column water speeds (measured by ADCP instrument, cm s-1). Seasons were defined as follows: winter = 21 Dec‒20 Mar, spring = 21 Mar‒20 Jun, summer = 21 Jun‒20 Sep, and fall = 21 Sep‒20 Dec. Winter here indicates the previous winter to the arrival of the whales to the Bering Strait.

| **Fin Whales** | | | |
| --- | --- | --- | --- |
| **Variable (*x*)** | ***R*²** | ***p*** | **Equation** |
| Bottom Temp Winter | 0.69 | 0.006 | *y* = 70.9*x* + 435.1 |
| Bottom Temp Spring | 0.63 | 0.01 | *y* = 17.4*x* + 332.7 |
| Bottom Temp Summer | 0.73 | 0.003 | *y* = 8.6*x* + 293.2 |
| Bottom Temp Fall | 0.69 | 0.005 | *y* = 8.6*x* + 301.6 |
| SST Winter | 0.58 | 0.02 | *y* = 45.7*x* + 389.8 |
| SST Spring | 0.59 | 0.02 | *y* = 16.9*x* + 318.6 |
| SST Fall | 0.54 | 0.02 | *y* = 9.8*x* + 297.9 |
| Water Speed Winter | 0.69 | 0.006 | *y* = 1.3*x* + 272.3 |
| **Humpback Whales** | | | |
| **Variable (*x*)** | ***R*²** | ***p*** | **Equation** |
| Bottom Temp Winter | 0.78 | 0.002 | *y* = 61*x* + 413.1 |
| Bottom Temp Spring | 0.61 | 0.01 | *y* = 13.8*x* + 323.7 |
| Bottom Temp Summer | 0.53 | 0.03 | *y* = 5.8*x* + 295.1 |
| Bottom Temp Fall | 0.61 | 0.01 | *y* = 6.6*x* + 299.4 |
| SST Winter | 0.83 | 0.001 | *y* = 44.1*x* + 381.8 |
| SST Spring | 0.73 | 0.003 | *y* = 15.2*x* + 312.9 |
| SST Summer | 0.52 | 0.03 | *y* = 7.2*x* + 270.7 |
| SST Fall | 0.66 | 0.008 | *y* = 8.7*x* + 294.4 |

**Table S3.** Best models for each species according to Akaike information criterion with a correction for small sample sizes (AICc) along with their *R*2 values (Cox-Snell). Other models that had ΔAICc < 10 are also listed. Note that the two models for gray whale had the same AICc score and *R*2 value, thus we chose the model with fewer variables.The smoothing terms are specified next to the variable names: cs = cubic spline, pb = penalized b-spline smoothers. DOY = day of the year; SBE Temp = daily mean near-bottom temperatures; SBE Salt = daily mean near-bottom salinities; Water Speed = daily mean water speeds; Wind Speed = daily mean wind speeds; SST Grad = SST gradient (represents presence of a thermal front); SST Grad Lagged = SST Gradient lagged by one month.

| **AICc** | **Fin Whale Models** | **ΔAICc** | ***R*²** |
| --- | --- | --- | --- |
| 3320 | pb(DOY) + cs(SBE Temp) + cs(SST) + cs(Water Speed) + cs(SSTGrad) + cs(SST Grad Lagged) | 0 | 0.51 |
| 3324 | pb(DOY) + cs(SBE Temp) + cs(SST) + cs(Water Speed) + cs(Wind Speed) + cs(SST Grad) + cs(SST Grad Lagged) | 4 | 0.51 |
| 3329 | pb(DOY) + cs(SBE Temp) + cs(SST) + cs(Water Speed) + cs(SST Grad) | 9 | 0.5 |
| **AICc** | **Humpback Whale Models** | **ΔAICc** | ***R*²** |
| 4454 | pb(DOY) + cs(SBE Temp) + cs(SBE Salt) +cs(SST) + cs(Water Speed) + cs(Wind Speed) + cs(SST Grad) + cs(SST Grad Lagged) | 0 | 0.6 |
| 4455 | pb(DOY) + cs(SBE Temp) +cs(SST) + cs(Water Speed) + cs(Wind Speed) + cs(SST Grad) + cs(SST Grad Lagged) | 1 | 0.59 |
| 4460 | pb(DOY) + cs(SBE Temp) +cs(SST) + cs(Water Speed) + cs(Wind Speed) + cs(SST Grad Lagged) | 6 | 0.59 |
| 4462 | pb(DOY) + cs(SBE Temp) + cs(SBE Salt) +cs(SST) + cs(Water Speed) + cs(Wind Speed) + cs(SST Grad Lagged) | 8 | 0.59 |
| **AICc** | **Gray Whale Models** | **ΔAICc** | ***R*²** |
| 3087 | pb(DOY) + cs(SBE Temp) + cs(SBE Salt) + cs(SST) + cs(Water Speed) + cs(Wind Speed) + cs(SST Grad Lagged) | 0 | 0.45 |
| 3087 | pb(DOY) + cs(SBE Temp) + cs(SBE Salt) + cs(SST) + cs(Water Speed) + cs(Wind Speed) + cs(SST Grad) + cs(SST Grad Lagged) | 0 | 0.45 |


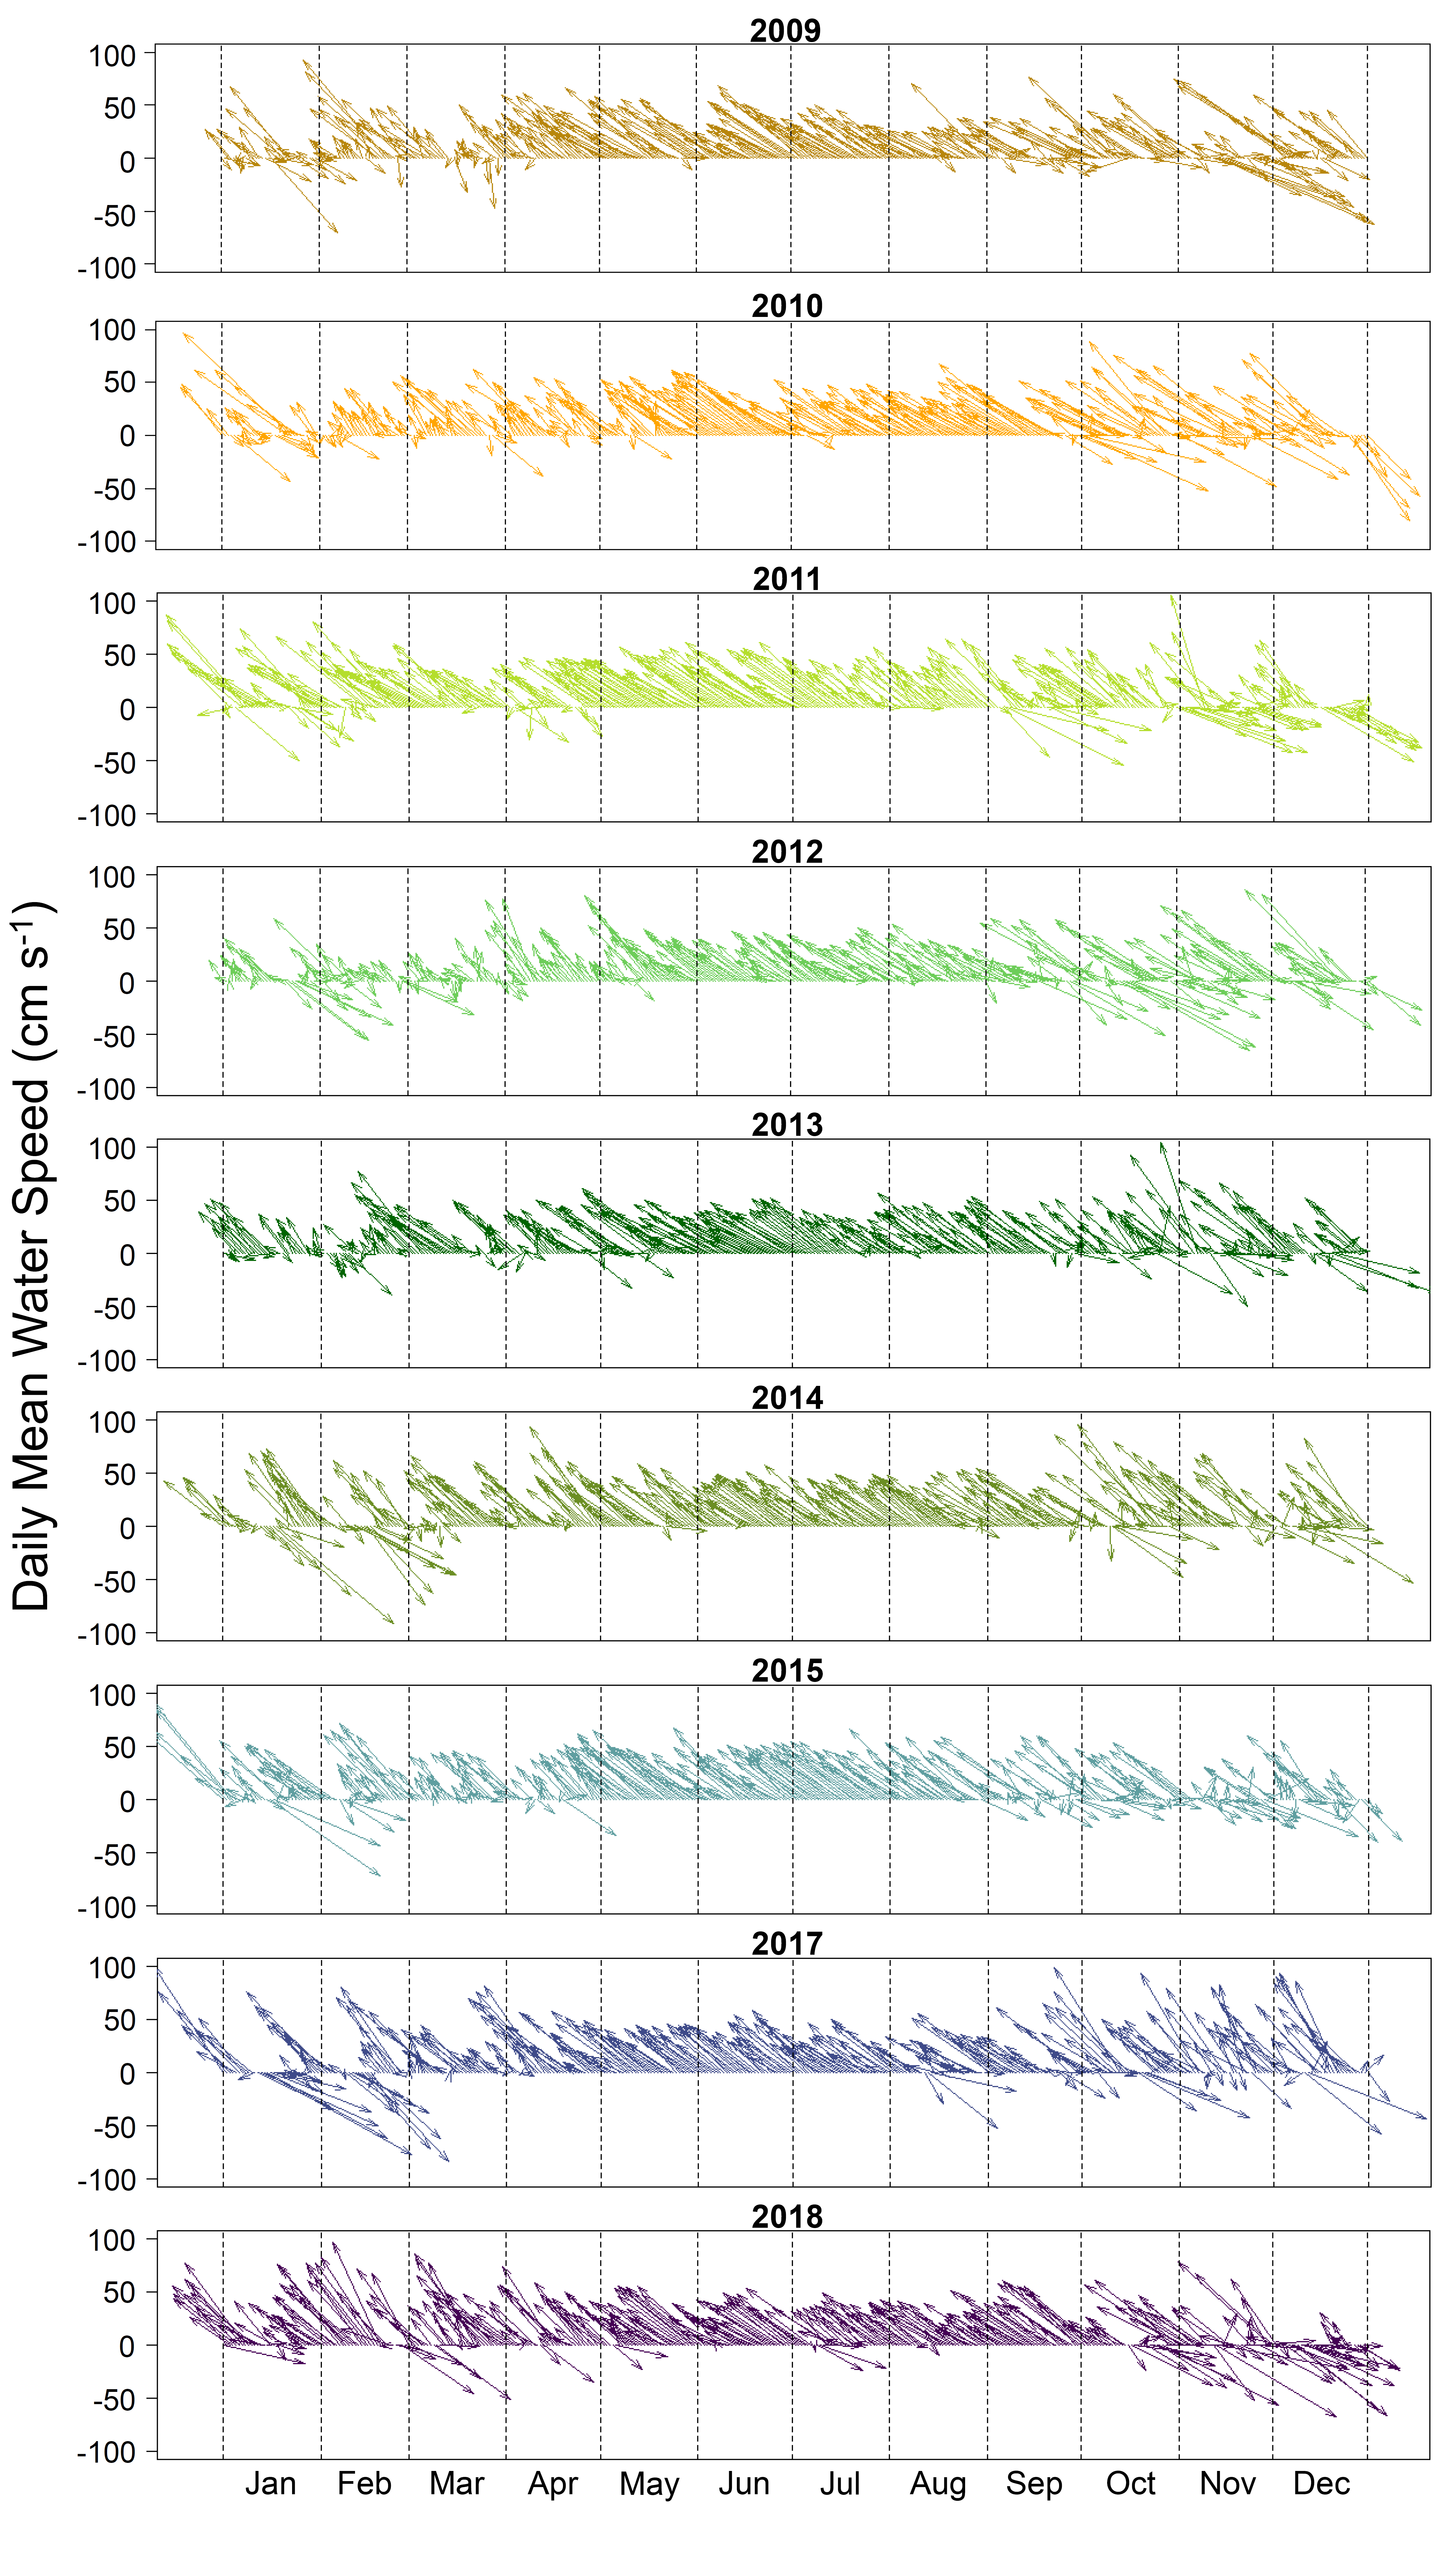


**Fig. S1.** Vector plots of daily mean water speed (cm s-1) measured at 30-m depth at the A3 mooring site.


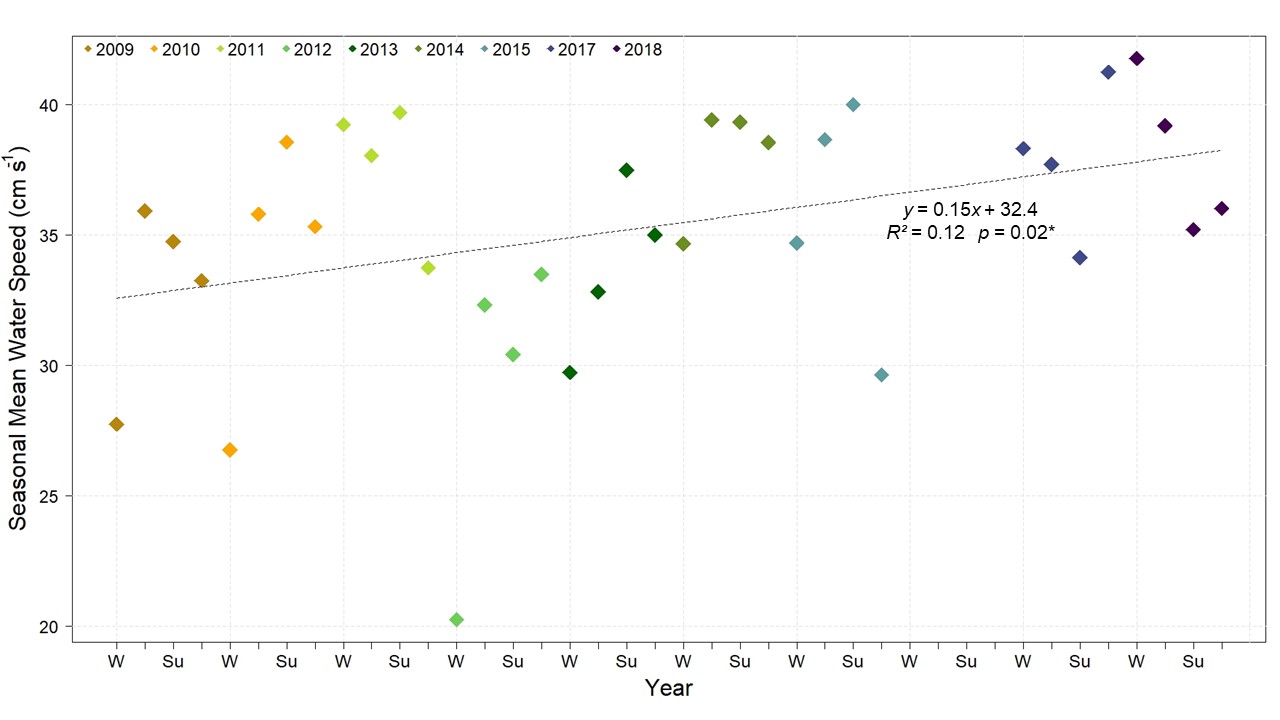
**Fig. S2.** Seasonal means for water speed (cm s-1) measured at 30-m depth at the A3 mooring site. Note that 2016 was omitted since we do not have acoustic data for that year. The seasons were defined as follows: Winter (‘W’) = 21 Dec‒20 Mar; Spring = 21 Mar‒20 Jun; Summer (‘Su’) = 21 Jun‒20 Sep; Fall = 21 Sep‒20 Dec. Water speeds throughout the seasons were highly variable with standard deviations ranging from 13 cm s-1 to 27 cm s-1. A linear regression of the seasonal means with year shows a significant increasing trend over the study period (*p* = 0.02).


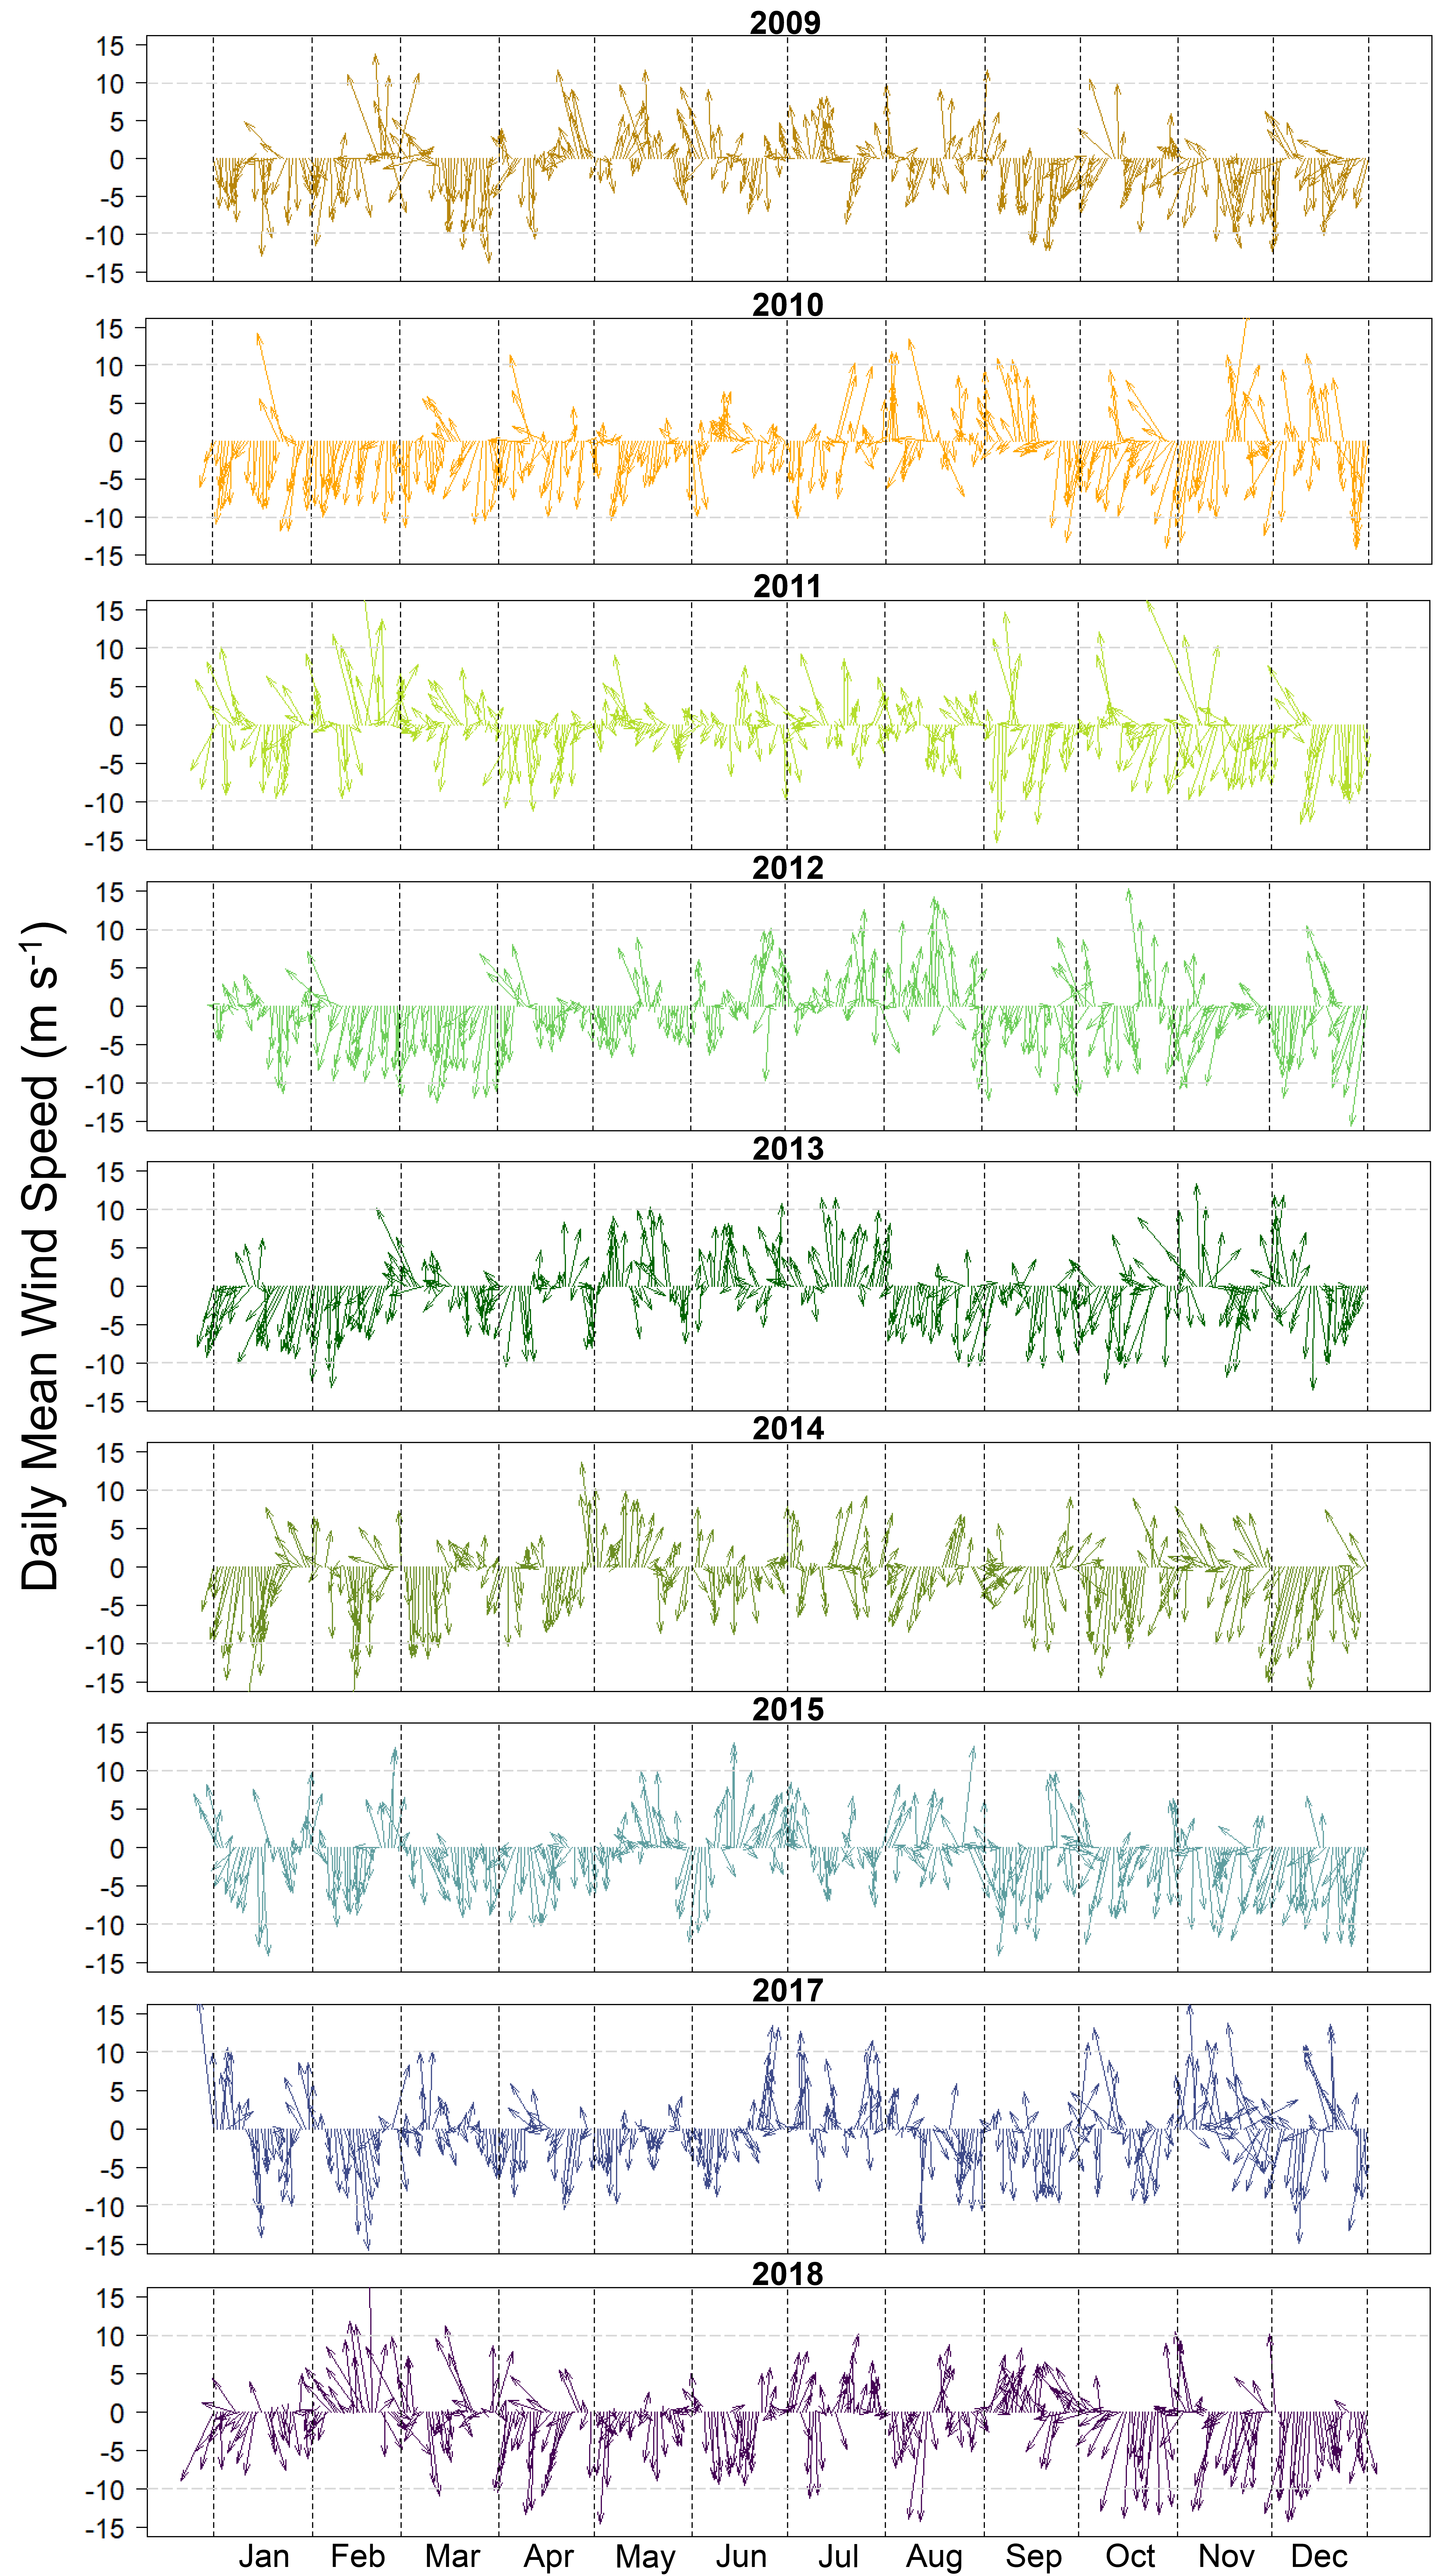


**Fig. S3.** Vector plots of daily mean wind speed (cm s-1) at the A3 mooring site. The gray dashed lines at ± 10 m s-1 indicate strong wind speeds.


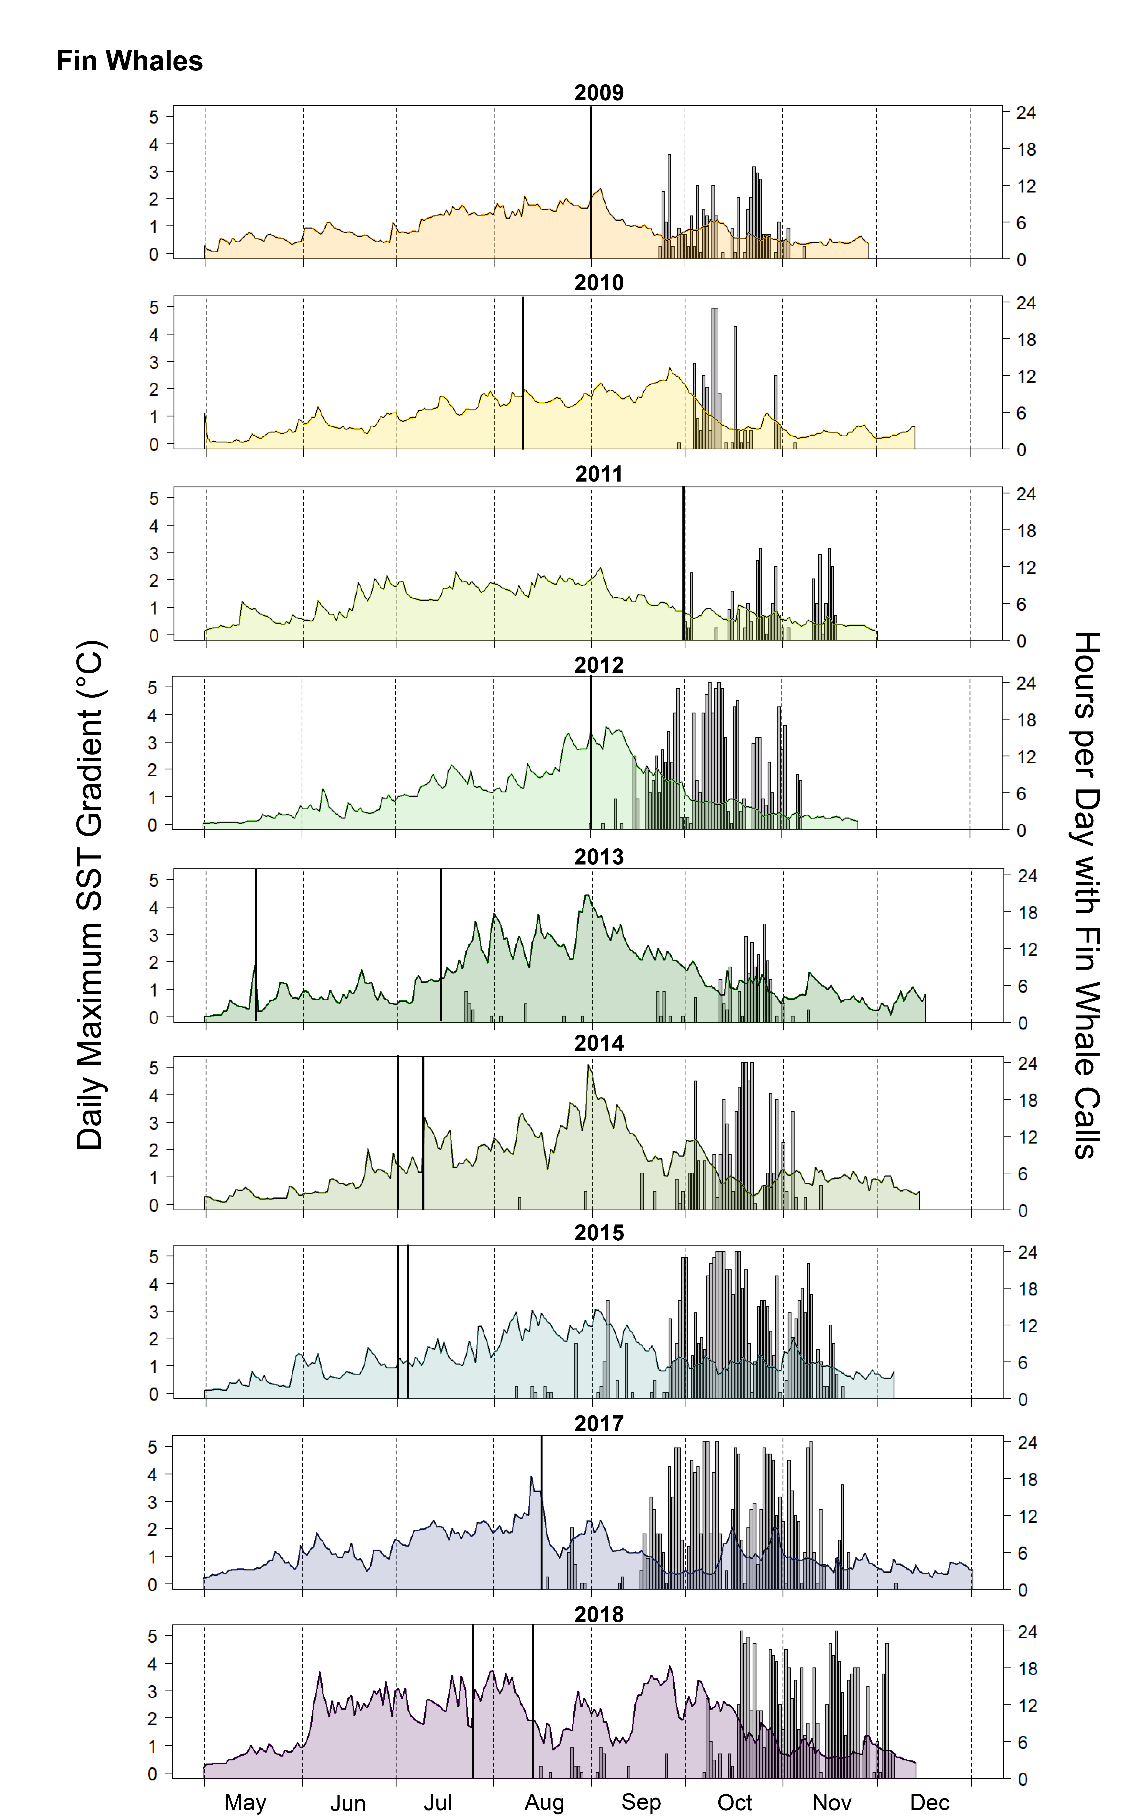


**Fig. S4.** Plots of the daily maximum sea-surface temperature (SST) gradient (°C) within a 30-km radius of the A3 mooring site for the open-water season of each year (1 May through freeze-up; see Table 2). The SST gradient is a proxy for the presence of a thermal front—the higher the gradient, the stronger the front. Each plot is overlaid with a bar plot of the hours per day with fin whale calls with bold lines indicating the start and end of the recording period.


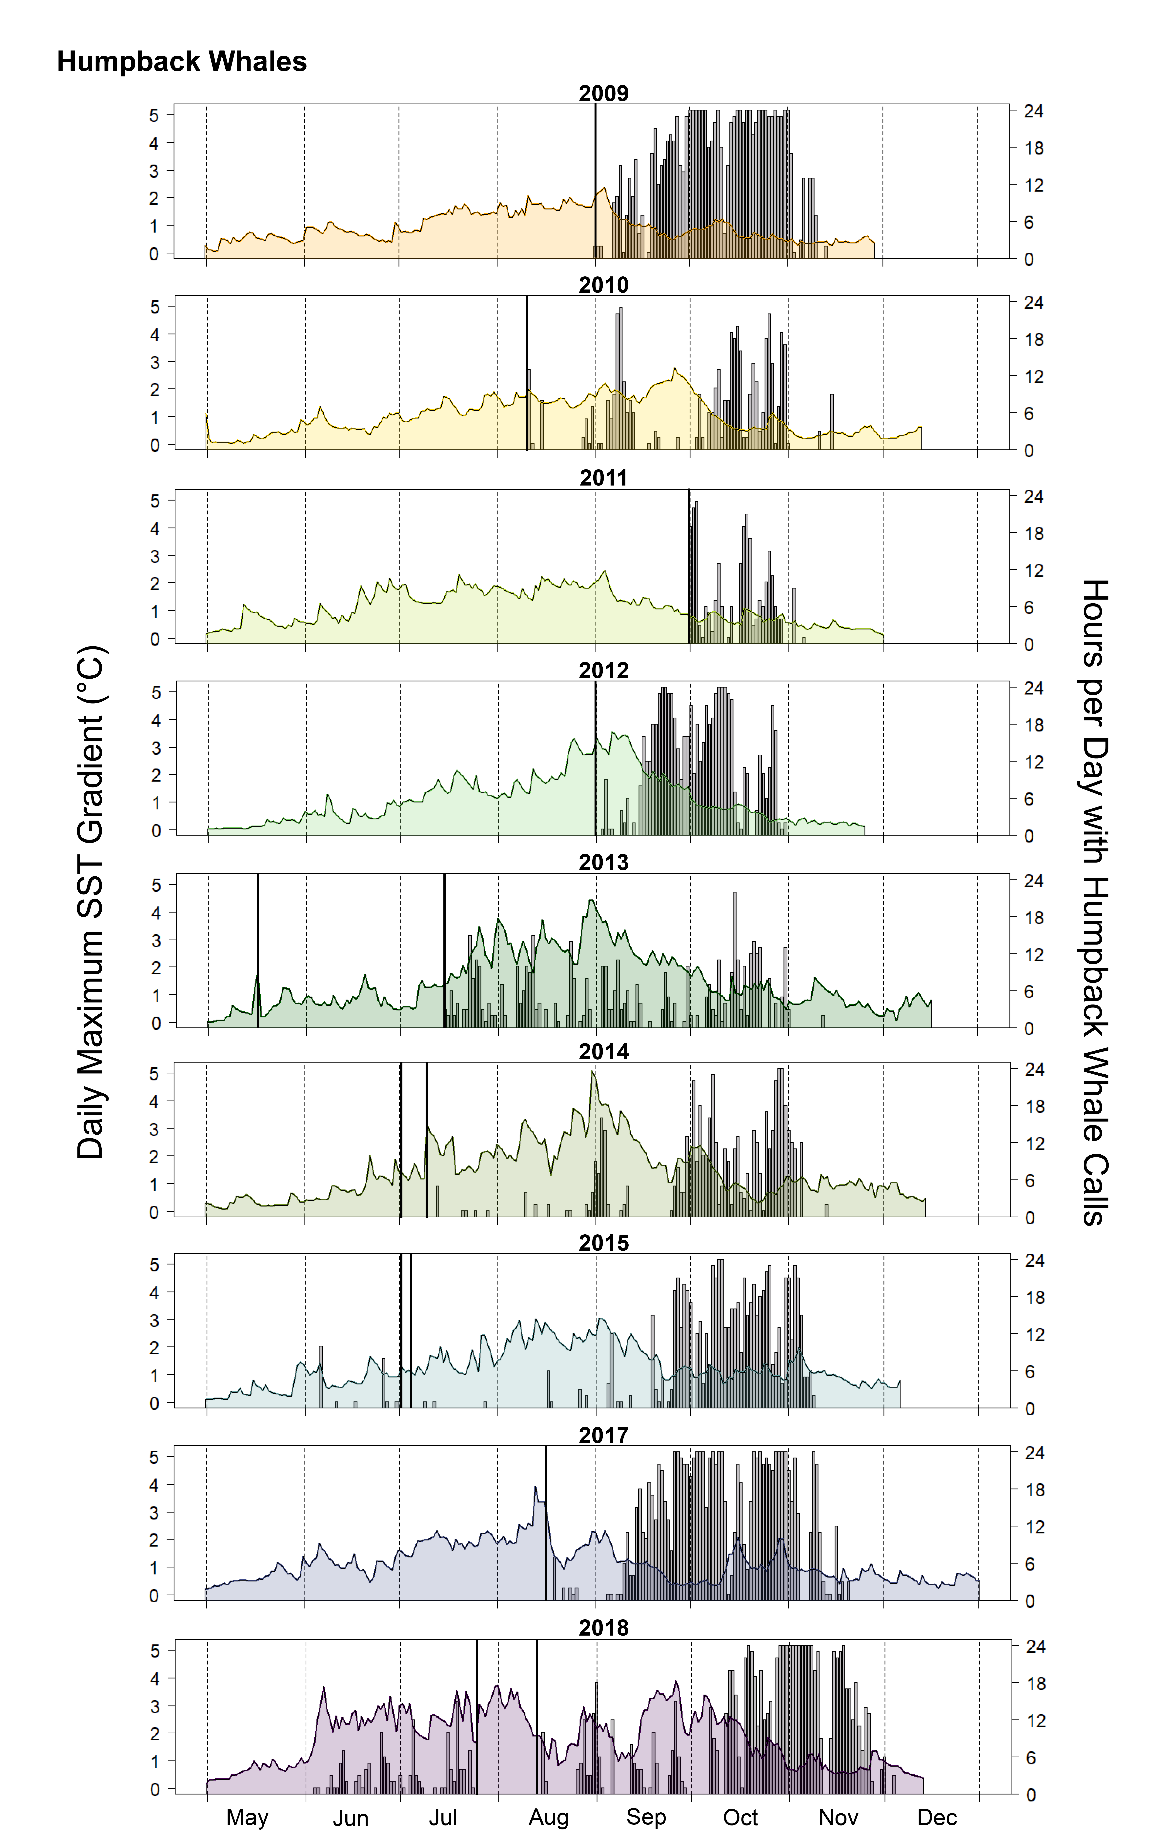


**Fig. S5.** Plots of the daily maximum sea-surface temperature (SST) gradient (°C) within a 30-km radius of the A3 mooring site for the open-water season of each year (1 May through freeze-up; see Table 2). The SST gradient is a proxy for the presence of a thermal front—the higher the gradient, the stronger the front. Each plot is overlaid with a bar plot of the hours per day with humpback whale calls with bold lines indicating the start and end of the recording period.


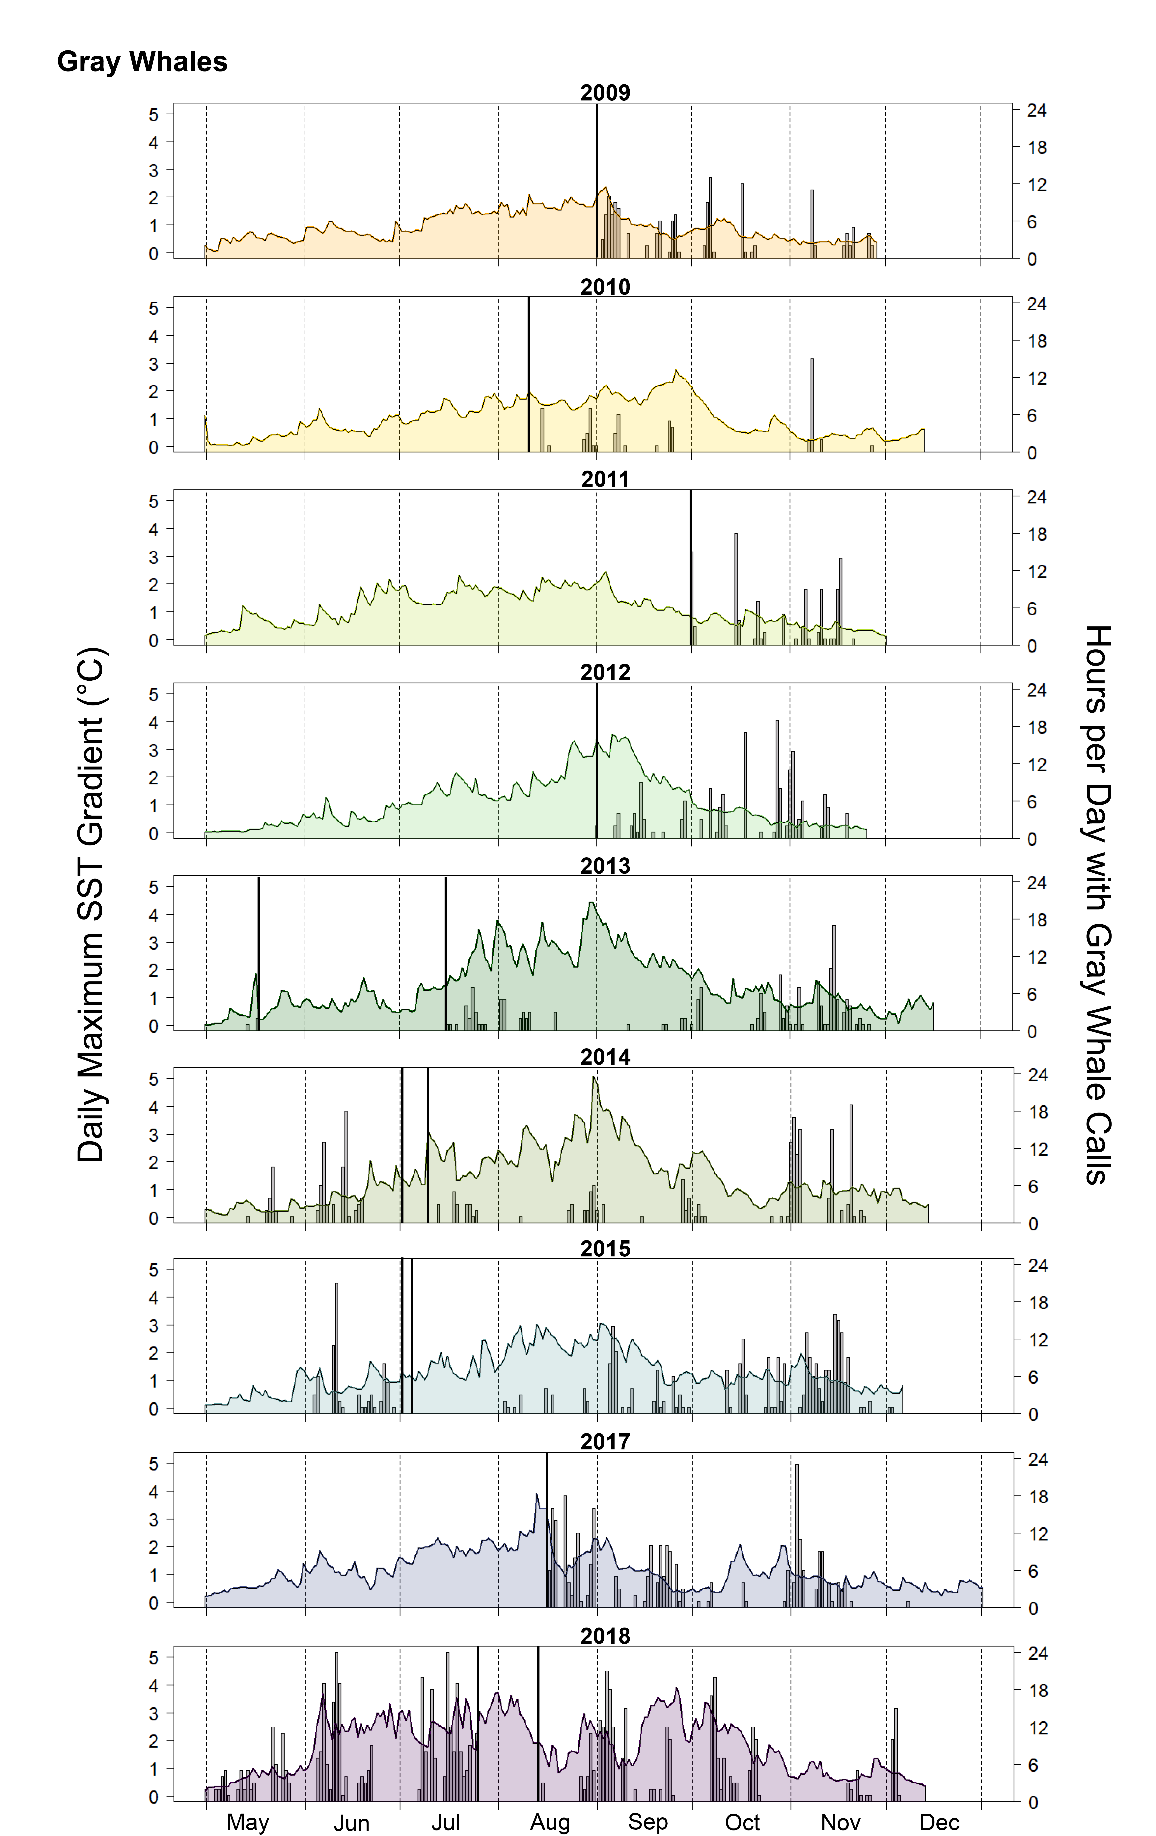


**Fig. S6.** Plots of the daily maximum sea-surface temperature (SST) gradient (°C) within a 30-km radius of the A3 mooring site for the open-water season of each year (1 May through freeze-up; see Table 2). The SST gradient is a proxy for the presence of a thermal front—the higher the gradient, the stronger the front. Each plot is overlaid with a bar plot of the hours per day with gray whale calls with bold lines indicating the start and end of the recording period.


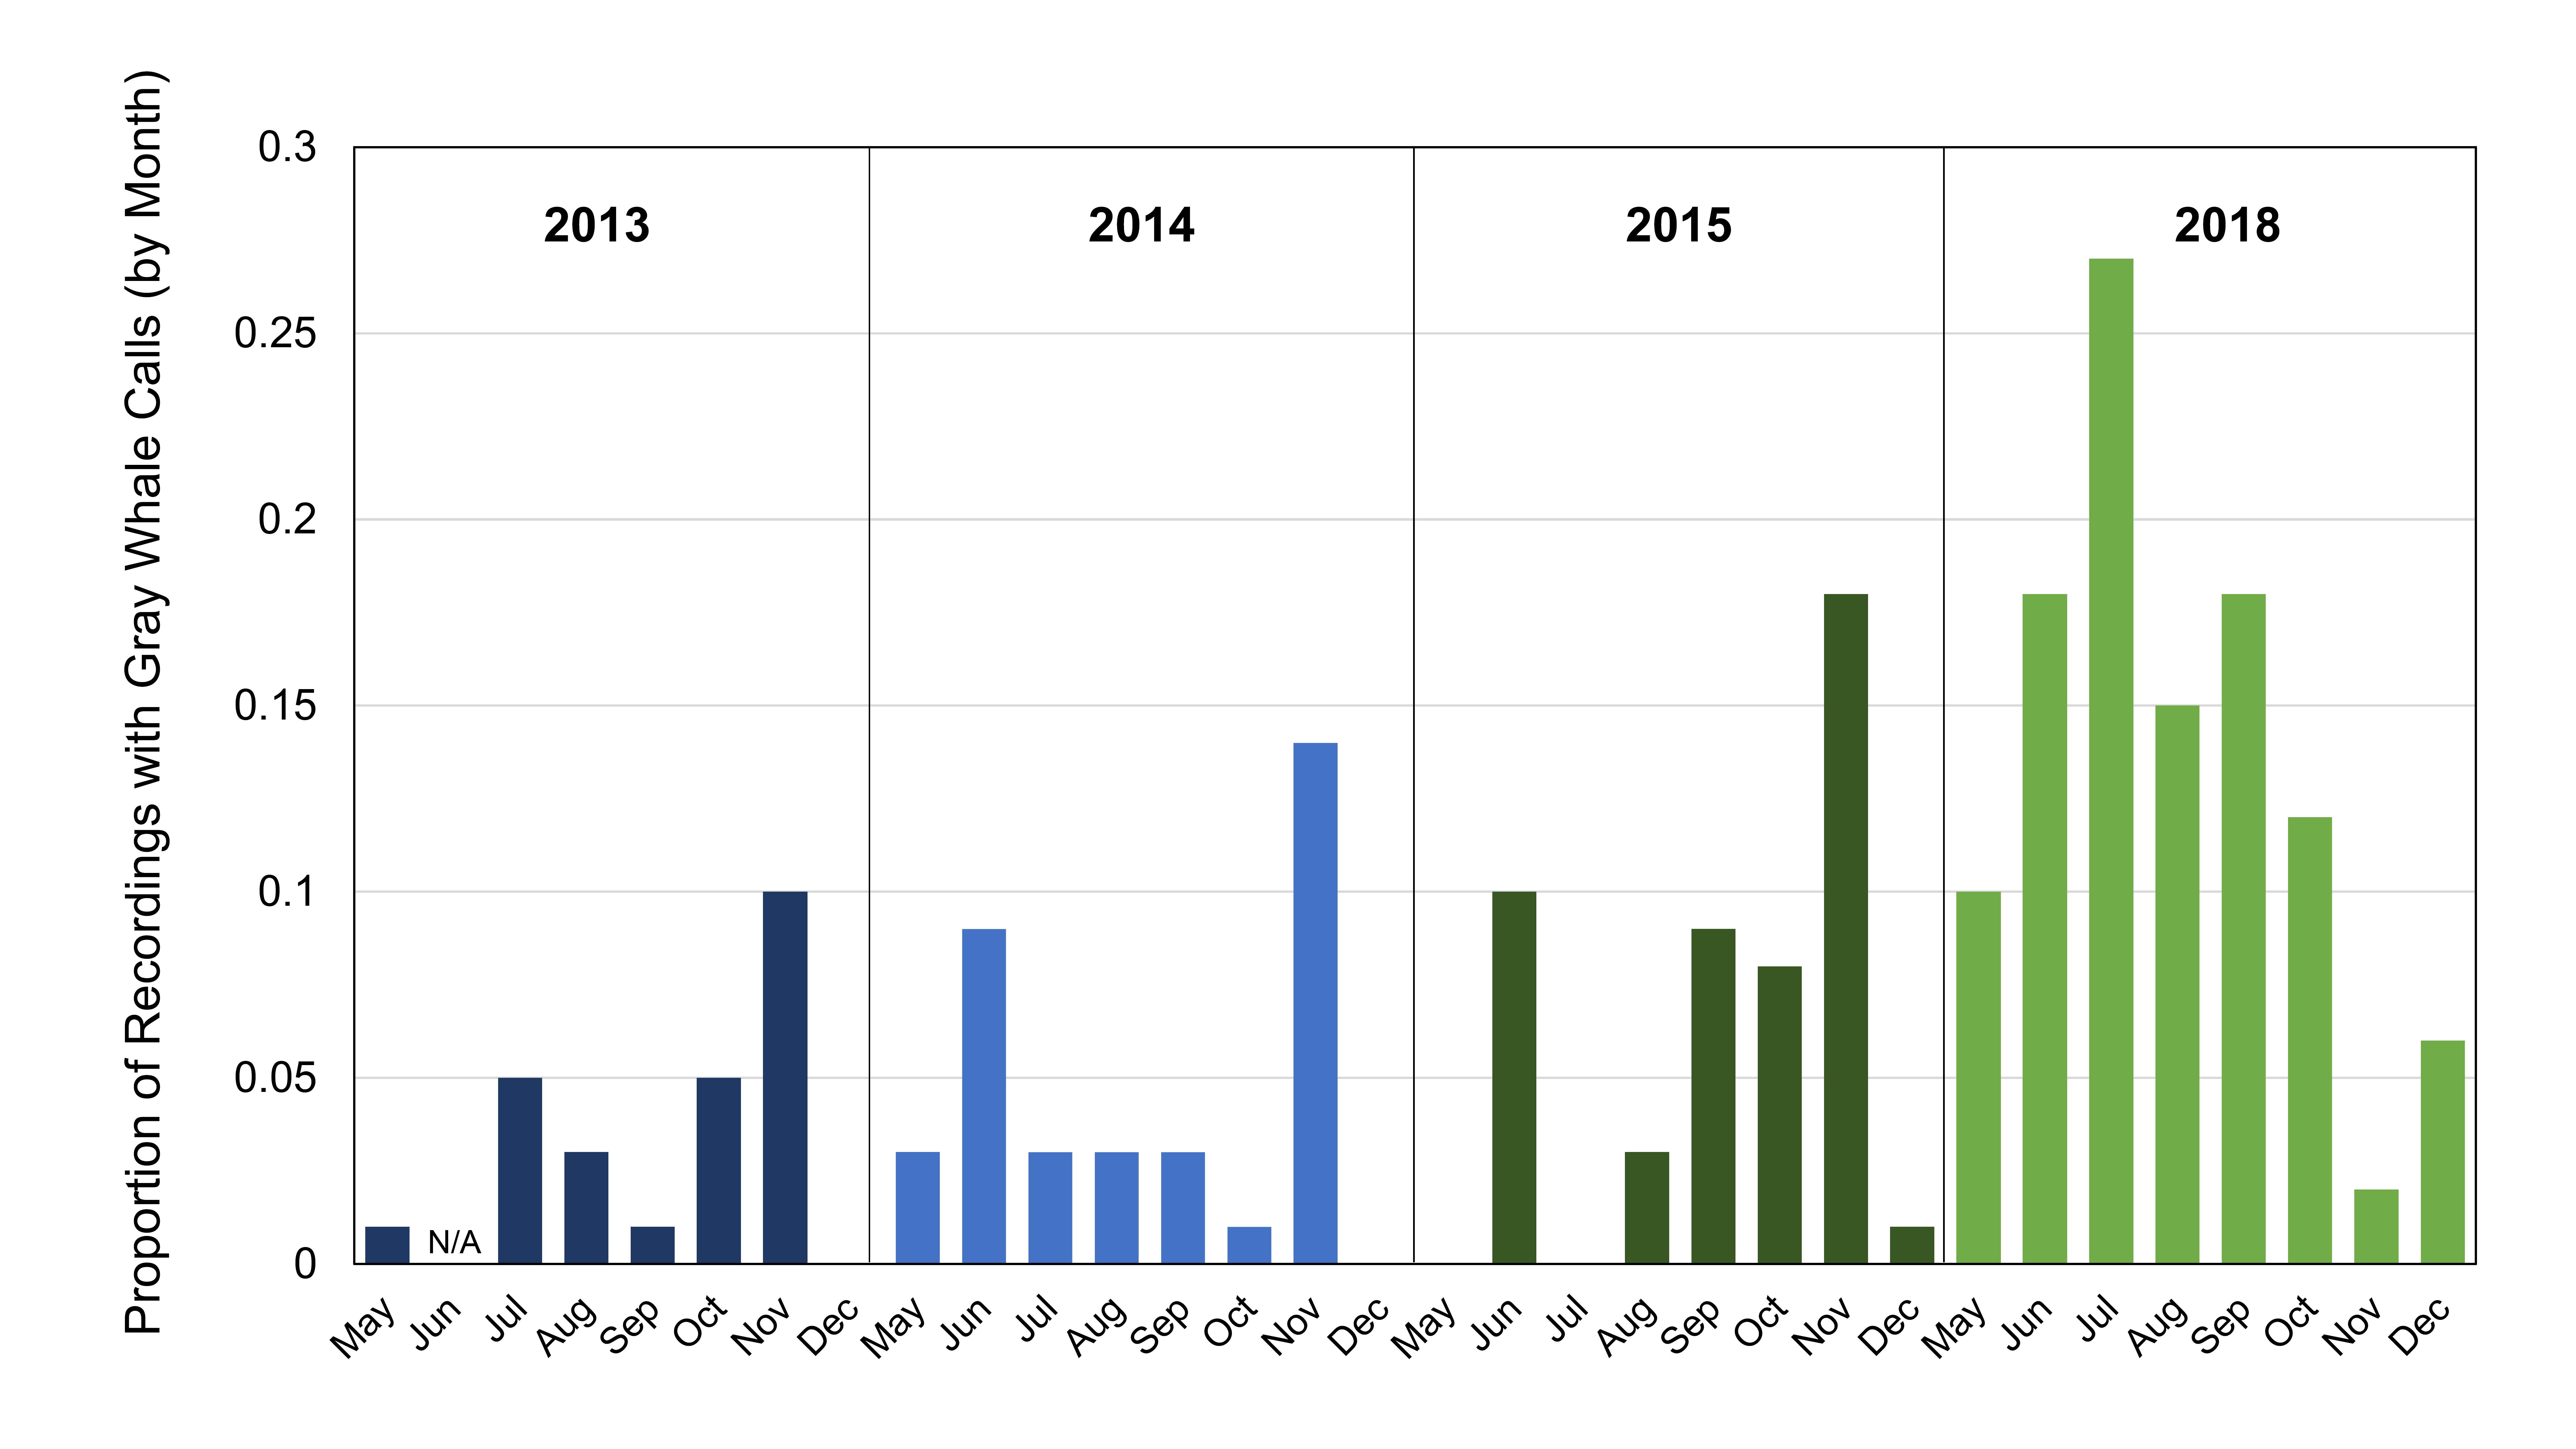


**Fig. S7.** Proportion of recordings with gray whale calls by month. Only the years with both spring and fall recordings are shown. In some years, particularly 2013 and 2014, a peak in gray whale calls is evident in the spring and fall, possibly reflecting the spring and fall migration of gray whales into and from the study region.
